1 Modification of plant regeneration medium decreases the time for recovery of *Solanum lycopersicum* cultivar M82  
2 stable transgenic lines

3

4 Sarika Gupta and Joyce Van Eck\*

5 The Boyce Thompson Institute, 533 Tower Road, Ithaca, NY 14853 USA

6

7 \*Corresponding author, e-mail: [jv27@cornell.edu](mailto:jv27@cornell.edu); phone: 607-254-1686; fax: 607-254-1242

8

9 Sarika Gupta, e-mail: [sarikagupt9@gmail.com](mailto:sarikagupt9@gmail.com)

10

11 **Acknowledgements** We thank Cynthia Du for assistance with part of the experimental process. We thank  
12 Cynthia Du, Patricia Keen, and Michelle Tjahjadi for their critical review of the manuscript. Support for this work  
13 was through a grant from the National Science Foundation Plant Genome Research Program (IOS-1237880).

14

15 **Author contribution statement** SG and JVE designed the experiments, SG performed the experiments, SG  
16 and JVE wrote the manuscript. Both authors read and approved the manuscript.

17

18 **Compliance with ethical standards**

19 **Conflict of interest** The authors declare that they have no competing interests.

20

21

22

23

24

25

26

27

28 Key Message: We decreased the time for recovery of tomato transgenic lines by 6 weeks through the addition of  
29 indole-3-acetic acid to our standard plant regeneration medium.

30

31 **Abstract**

32 Tomato (*Solanum lycopersicum*) has rapidly become a valuable model species for a variety of studies including  
33 functional genomics. A high-throughput method to obtain transgenic lines sooner than standard methods would  
34 greatly advance gene function studies. The goal of this study was to optimize our current transformation method  
35 by investigating medium components that would result in a decreased time for recovery of transgenics. For this  
36 study, 6-day-old cotyledon explants from *Solanum lycopersicum* cultivar M82 *in vitro*-grown seedlings were  
37 infected with the *Agrobacterium tumefaciens* strain LBA4404 containing the binary vector pBI121. This vector  
38 contains the  $\beta$ -glucuronidase reporter gene and the neomycin phosphotransferase II selectable marker gene that  
39 confers resistance to kanamycin. Modification of our standard plant regeneration medium with indole-3-acetic  
40 acid (IAA) at concentrations of either 0.05 mg/l or 0.1 mg/l decreased the recovery time for transgenic lines by 6  
41 weeks as compared to our standard medium that contains zeatin as the only plant growth regulator. We observed  
42 50% and 54% transformation efficiency on plant regeneration medium containing 0.05 mg/l and 0.1 mg/l IAA,  
43 respectively. Moreover, addition of 1 mg/l IAA to the root induction medium resulted in earlier root development  
44 than medium that did not contain IAA. Addition of IAA to the plant regeneration and rooting media did not have  
45 any negative effects on plant development. Recovery of transgenic lines in a shorter time results in higher  
46 throughput for the introduction of gene constructs and has the potential to decrease the time and resources  
47 needed to complete investigations of gene function.

48

49 **Keywords:** *Agrobacterium tumefaciens*; indole-3-acetic acid; *Solanaceae*; *Solanum pimpinellifolium*; tomato

50

## 51 Introduction

52 Tomato, *Solanum lycopersicum*, is a member of the *Solanaceae* family, which contains approximately 3,000 plant  
53 species and includes some of the most economically important food crops. It is native to South America and was  
54 brought to Europe in the 1500s and then to North America in the 1800s (Jones 1998). Tomato is a perennial plant  
55 that has two different growth habits, determinate and indeterminate. There are two different market types of  
56 tomatoes, fresh market and processing. According to the Agricultural Marketing Resource Center, in 2014 the US  
57 dollar value for fresh market tomatoes was 1.14 billion and 1.325 billion for processing types, which are used to  
58 make products such as juice, sauces, and ketchup [2]. In addition to being an economically important food crop,  
59 tomato is an excellent source of health beneficial nutrients including beta-carotene and lycopene.

60 Over the years, utilization of tomato as a model plant species has increased because of readily available  
61 resources such as mutant populations (Emmanuel and Levy 2002), bioinformatics tools (Bombarely et al. 2011),  
62 and a high quality reference genome (Consortium 2012). In addition, since the very first report of *Agrobacterium*-  
63 mediated transformation of tomato by McCormick et al. (McCormick et al. 1986), there have been other reports of  
64 successful transformations of different genotypes (Chyi and Phillips 1987; Fillatti et al. 1987; Frary and Earle 1996;  
65 Park et al. 2003; Sun et al. 2006; Van Eck et al. 2006) and methods to improve transformation efficiency (Dan et al.  
66 2016). A key aspect for the adoption of a model plant species is the availability of efficient transformation  
67 methodology. This was certainly the case for *Arabidopsis*, which is by far the most widely used model for plant  
68 research programs (Somerville and Koornneef 2002).

69 While there are several methods available for plant transformation, *Agrobacterium tumefaciens*-mediated  
70 transformation has become the most extensively used method (Gelvin 2003; Pitzschke and Hirt 2010). Despite its  
71 effectiveness for gene transfer in tomato, there is still need for improvement. Improving methodology to decrease  
72 the time from introduction of a gene construct of interest to recovery of stable transgenics would improve the  
73 throughput and shorten the timeframe for studies that utilize tomato transgenic lines.

74 We were interested in finding an approach to decrease the time to obtain transgenic lines of the processing  
75 type tomato M82 because this genotype is used for gene function studies in our lab as well as others (Brooks et al.  
76 2014; Xu et al. 2015). We chose to start by investigating supplementation of our standard plant regeneration and  
77 rooting media with a growth regulator that had the potential to speed up plant development (Van Eck et al. 2006).

78 Cytokinins and auxins are important hormones that influence growth and developmental processes in plants.  
79 Interactions between cytokinins and auxins have been shown to be necessary for the shoot apex growth (Gupta  
80 and Rashotte 2012; Shimizu-Sato et al. 2009). Auxin has also been shown to play a role in the specification of the  
81 root apical meristem (Friml et al. 2003; Gupta and Rashotte 2012; Sabatini et al. 1999). The hormonal interactions  
82 can be utilized in the area of tissue culture to leverage the presence of the hormones in the medium. In this study,  
83 we report the effects of the addition of the auxin, indole-3-acetic acid (IAA) on the recovery time of M82  
84 transgenic lines.

85

## 86 **Materials and methods**

### 87 *Plant material*

88 Seeds of *Solanum lycopersicum* cv M82 were surface sterilized in 20% (v/v) bleach solution containing Tween-20  
89 for 20 min followed by 3 rinses in sterile water. Seeds were germinated in Magenta GA7 boxes (Caisson Labs,  
90 Logan, UT) that contained 50 ml of Murashige and Skoog (MS) (Murashige and Skoog 1962) (Caisson Labs) based  
91 medium containing 2.15 g/l MS salts, 100 mg/l myo-inositol, 2 mg/l thiamine, 0.5 mg/l pyridoxine, 0.5 mg/l  
92 nicotinic acid, 10 g/l sucrose and 8 g/l Sigma agar (Sigma-Aldrich, St. Louis, MO). Cultures were maintained at 24°C  
93 under a 16h light/8h dark photoperiod at  $57 - 65 \mu\text{E m}^{-2} \text{s}^{-1}$ .

94 One day prior to infection with *Agrobacterium*, cotyledon explants and feeder layer plates were prepared.  
95 Feeder layers were prepared before cutting the explants by dispensing 2 ml of a 1-week-old NT1 suspension  
96 culture onto KCMS medium (4.3 g/l MS salts, 100 mg/l myo-inositol, 1.3 mg/l thiamine, 0.2 mg/l 2,4-  
97 dichlorophenoxy acetic acid, 200 mg/l  $\text{KH}_2\text{PO}_4$ , 0.1 mg/l kinetin, 30 g/l sucrose, 5.2 g/l Agargel (Sigma Aldrich), pH  
98 6.0. The suspension was covered with a sterile 7 cm Whatman filter paper. Explants were excised from 6-day-old  
99 seedlings before the first true leaves emerged. To prepare the explants, seedlings were placed on a sterile paper  
100 towel moistened with sterile water. Cotyledons were excised at the petioles, cut into approximately 1 cm sections,  
101 placed adaxial side down on the KCMS feeder layer plates, and maintained at 24°C under a 16 h light/8 h dark  
102 photoperiod at  $57 - 65 \mu\text{E m}^{-2} \text{s}^{-1}$ .

103

104

105 *Bacterial strain and binary vector*

106 Electroporation was used to introduce the pBI121 vector (Chen et al., 2003) into the *Agrobacterium tumefaciens*  
107 strain LBA4404. A single, well-formed colony from the selection plate was transferred to 50 ml of YEP selective  
108 medium that contained 50 mg/l kanamycin and maintained in a shaking incubator at 28°C for 18 – 24 hrs or the  
109 length of time needed to reach an OD<sub>600</sub> of 0.6 - 0.7. The *Agrobacterium* suspension was centrifuged at 8000 rpm  
110 for 10 min at 20°C. The pellet was resuspended in 50 ml of 2% MSO medium (4.3 g/l MS salts, 100 mg/l myo-  
111 inositol, 0.4 mg/l thiamine, and 20 g/l sucrose) by vortexing.

112

113 *Agrobacterium-mediated transformation*

114 Cotyledon explants were incubated in the *Agrobacterium*/2% MSO suspension for 5 min, transferred to a sterile  
115 paper towel to allow excess suspension to briefly drain, placed back onto the feeder plates with the adaxial sides  
116 down, and co-cultivated in the dark at 19°C for 48 hrs. Explants, adaxial side up, were transferred to our standard  
117 plant regeneration selective medium designated 2ZK that contained 4.3 g/l MS salts, 100 mg/l myo-inositol, 1 ml/l  
118 Nitsch vitamins (1000x), 20 g/l sucrose, 2 mg/l trans-zeatin, 75 mg/l kanamycin, 300 mg/l timentin, and 5.2 g/l  
119 Agargel. One week later, the explants were transferred onto 2ZK medium containing IAA at either 0 mg/l, 0.01  
120 mg/l, 0.05 mg/l, 0.1 mg/l, or 0.5 mg/l IAA.

121 After two weeks, explants were transferred onto 1ZK medium that contained 4.3 g/l MS salts, 100 mg/l myo-  
122 inositol, 1 ml/l Nitsch vitamins (1000x), 20 g/l sucrose, 1 mg/l trans-zeatin, 75 mg/l kanamycin, 300 mg/l timentin,  
123 5.2 g/l Agargel, and IAA at either 0 mg/l, 0.01 mg/l, 0.05 mg/l, or 0.1 mg/l IAA, or 0.5 mg/l in plates or Magenta  
124 GA7 boxes depending upon the size of the shoots regenerating from the cotyledon explants.

125 When shoots were approximately 3 mm tall, they were excised from the cotyledon explants and transferred to  
126 selective rooting medium designated RMK (4.3 g/l MS salts, 1 ml/l Nitsch vitamins (1000x), 30 g/l sucrose, pH 6.0, 8  
127 g/l Difco Bacto agar (Becton, Dickinson and Company, Franklin Lakes, NJ), 75 mg/l kanamycin, 300 mg/l timentin,  
128 and IAA at either 0 mg/l or 1 mg/l in Magenta GA7 boxes.

129 Unless otherwise noted, the pH of all media was adjusted to 5.8 before autoclaving. For all media, the trans-  
130 zeatin, IAA, kanamycin, and timentin were dispensed from filter sterilized stock solutions into autoclaved medium

131 that was allowed to cool to 55°C. Cotyledon explant cultures were transferred to freshly prepared medium every  
132 two weeks.

133

#### 134 *GUS histochemical assay*

135 Histochemical assay of  $\beta$ -glucuronidase (GUS) activity was performed on leaves from putative transgenic and  
136 control (non-transformed) plants. Leaves were vacuum infiltrated for 20 – 30 min in buffer (0.8 g/l 5-bromo-4-  
137 chloro-3-indolyl- $\beta$ -D-glucuronide (X-Gluc), 0.1 M Na<sub>2</sub>HPO<sub>4</sub>, 0.1 M NaH<sub>2</sub>PO<sub>4</sub> phosphate, 10 mM ethylenediamine  
138 tetraacetic acid (EDTA), 1.6 mM potassium-ferricyanide and 1.6 mM potassium –ferrocyanide, 5% v/v Triton X-100,  
139 and 20% v/v methanol) before incubation at 37°C overnight. The chlorophyll was removed from the leaves by 3 - 4  
140 washes with 70% ethanol at room temperature. The leaves were examined with a Leica S8APO stereomicroscope  
141 outfitted with a digital camera.

142

#### 143 *Polymerase chain reaction analysis*

144 To confirm the presence of the neomycin phosphotransferase II selectable marker gene (*nptII*), DNA was extracted  
145 from leaves of putative transgenic lines and controls (non-transformed) with the Qiagen DNeasy plant mini kit  
146 (Hilden, Germany) as per the manufacturer's instructions. Primers used to detect *nptII* were forward 5'-GGC TGG  
147 AGA GGC TAT TC-3' and reverse 5'-GGA GGC GAT AGA AGG CG-3'. The diagnostic amplicon size expected with  
148 these primers is approximately 700 bp. The PCR program started with a one-step cycle of 2 min at 95°C, followed  
149 by 29 cycles of 30 s at 94°C, 45 s at 57°C, 50 s at 72°C, and a 10 min final extension at 72°C. DNA was separated  
150 and visualized by electrophoresis through a 1% agarose, ethidium bromide-stained gel.

151

#### 152 *Experimental Design*

153 A total of 5 different experiments were performed. Three biological replicates were used for each IAA  
154 concentration in each experiment. A total of 750 cotyledon explants were used per IAA concentration  
155 investigated. The standard error was calculated.

156

157 **Results**

158 *Optimization of IAA concentration for recovery of stable transgenic lines*

159 After the co-cultivation period that followed infection with *Agrobacterium*, cotyledon explants were transferred to  
160 our standard selective plant regeneration medium designated 2ZK that contains 2 mg/l trans-zeatin as the only  
161 plant growth regulator. One week later, the explants were transferred to 2ZK supplemented with different IAA  
162 concentrations (0 mg/l, 0.01 mg/l, 0.05 mg/l, 0.1 mg/l, 0.5 mg/l) to determine if the addition of IAA would  
163 decrease the time from infection with *Agrobacterium* to recovery of stable transgenic lines. We continued to use  
164 this same series of IAA concentrations in the subsequent selective plant regeneration medium designated 1ZK.

165 Medium supplemented with IAA resulted in shoots that were more fully developed earlier in the culture  
166 process as compared to medium without IAA (Fig. 1A). In Figure 1A, cotyledon cultures shown in a – e represent  
167 controls that were not infected with *Agrobacterium*. We observed that as the IAA concentration increased, the  
168 level of plant regeneration from the controls decreased (Fig. 1A, a – d). Cotyledon explants infected with  
169 *Agrobacterium* and cultured on medium containing IAA exhibited the same pattern of shoot development as the  
170 cotyledons not infected, in that we observed more well-developed shoots at an early stage of culture post  
171 infection (Fig. 11 f – i). For our standard method without IAA (Fig. 1A, e), the level of plant regeneration is  
172 significantly less in comparison with medium that contained IAA.

173 In general, earlier emergence of well-developed shoots from *Agrobacterium*-infected cotyledon explants on  
174 medium containing IAA translated to the recovery of whole rooted plants in less time as compared with medium  
175 that did not contain IAA (Table 1). Medium containing either 0.05 mg/l or 0.1 mg/l IAA resulted in the shortest  
176 time, 11 wks, for recovery of stable transgenic lines. There appeared to be a threshold of IAA concentration and  
177 effect on recovery time because at 0.5 mg/l IAA the time was similar to our standard method. We observed a  
178 similar decrease in time when transformations of other tomato genotypes were performed by different lab  
179 members who tested plant regeneration medium that contained 0.1 mg/l IAA (data unpublished).

180

181 *Effect of IAA on transformation efficiency and rooting*

182 The formula below was used to calculate transformation efficiency (TE):

183

184 
$$\frac{\text{Total number of rooted shoots}}{\text{Total number of cotyledon explants infected with } Agrobacterium} \times 100$$
  
185  
186

187 Overall, the TE was lower when medium containing IAA was used as compared to the TE of 88% when medium  
188 containing trans-zeatin as the only growth regulator was used (Table 1).

189 When putative transgenic lines were approximately 3 - 4 cm tall, they were removed from the cotyledon  
190 explants and transferred to either our standard selective rooting medium (RMK) without IAA or RMK  
191 supplemented with 1 mg/l IAA designated RMIK. We chose this concentration based on previous work with  
192 tomato transgenic lines recovered from a few genotypes that did not root as well as M82 on our standard rooting  
193 medium (data not published). We observed that shoots cultured on RMIK resulted in the emergence of roots after  
194 6 - 7 days as compared to 11 - 14 days on RMK. The addition of IAA to the medium did not result in any  
195 phenotypic differences of the plants as compared to medium that did not contain IAA.

196

#### 197 *Characterization of putative transgenic lines*

198 The first level of analysis to confirm the recovered plants from *Agrobacterium*-infected cotyledons were transgenic  
199 was a histochemical assay for the GUS reporter protein. Whole leaves from plants rooted on RMK were used for  
200 the analysis. All leaves exhibited GUS activity, although we observed variation in the level of intensity with some  
201 leaves exhibiting a darker coloration than others (Fig 1B). GUS activity was not observed in leaves from non-  
202 transformed control plants.

203 To further confirm the recovered plants were indeed stable transgenic lines, we did PCR analysis for the  
204 presence of the *nptII* selectable marker gene in plants found to be positive for GUS activity. Total genomic DNA  
205 was isolated from the leaves of the GUS-positive lines and non-transformed control plants. PCR amplification of  
206 the *nptII* gene was detected in plants that were also GUS positive. No amplified product was detected in DNA from  
207 the control, (non-transgenic) plants (Fig. 1C).

208

#### 209 *Modified protocol*

210 Based on our findings, we now follow a modified protocol as outlined in Figure 2 for *Agrobacterium*-mediated  
211 tomato transformations. The modified protocol takes into account recovery time and TE. IAA concentrations of



212 0.05 and 0.1 mg/l IAA both resulted in a 6-week decrease for recovery of stable transformants, however, we chose  
213 to use 0.1 mg/l IAA in our modified protocol because of the 54% TE (Table 1). In addition to M82, we have applied  
214 this protocol to other tomato genotypes including the most closely related wild species, *Solanum pimpinellifolium*,  
215 and also observed a decrease in time for recovery of transgenic lines as compared to our previous tomato  
216 transformation methodology (data not published).

217

## 218 Discussion

219 For development of stable transformation methodology, the foremost factors to be considered are  
220 transformation efficiency and the time from infection with *Agrobacterium tumefaciens* until the recovery of  
221 transgenic lines. Various parameters have been investigated to reach a high transformation efficiency for tomato  
222 including application of lipoic acid to reduce tissue necrosis caused by *Agrobacterium* infection of the MicroTom  
223 genotype (Dan et al. 2016). Methods that provide both high efficiency and the shortest time to recovery of  
224 transgenic lines lead to a high-throughput pipeline that allows earlier evaluation of gene function. In turn, a high-  
225 throughput pipeline decreases the amount of labor and resources needed, which can translate into significant  
226 financial savings.

227 The focus of our study was to investigate medium components that had the potential to decrease the time for  
228 recovery of stable tomato transgenic lines. Our standard method, which has a high transformation efficiency at  
229 approximately 90%, takes 17 weeks for recovery of transformants. The interest in optimization of our methods  
230 stemmed from an increased need for transgenic lines because tomato has become the model species of choice for  
231 many studies that include ripening, abiotic and biotic tolerance, and nutritional content (Gonzali et al. 2009;  
232 Martel et al. 2011; Nguyen et al. 2010; Sun et al. 2010). In addition, with the recent demonstration of successful  
233 genome editing by CRISPR/Cas9 in tomato, the interest in applying this technology for the study of gene function  
234 will increase (Brooks et al. 2014; Ito et al. 2015). Therefore, a transformation methodology that can deliver  
235 modified lines in a shorter time frame will help to advance these studies.

236 Our standard protocol is a modified version of methods reported by Fillatti et al. (1987) in which zeatin is the  
237 only growth regulator incorporated into the plant regeneration medium (Van Eck et al. 2006). We chose to start  
238 our investigation by examining additional growth regulators that, in combination with zeatin, would greatly reduce

239 the time for recovery of stable transgenic lines but not have a significant negative effect on transformation  
240 efficiency. In a literature search, we found several reports that demonstrated a positive effect on tomato plant  
241 regeneration and transformation efficiency when indole-3-acetic acid (IAA) was incorporated into zeatin-  
242 containing plant regeneration medium (Gubis et al. 2004; Park et al. 2003; Yasmeen 2009). However, they did not  
243 report any effects observed on the time required to recover transgenic plants.

244 We found that addition of either 0.05 or 0.1 mg/l IAA to our standard plant regeneration medium that  
245 contains trans-zeatin as the only growth regulator decreased the time for recovery of stable transgenic lines from  
246 17 to 11 weeks. Previous reports have demonstrated that shoot apical meristem development involves  
247 interactions among cytokinin signaling pathway components, auxin, and several families of transcription factors  
248 (Gupta and Rashotte 2012). It is possible that the addition of IAA to our standard plant regeneration medium  
249 facilitates interactions among the cytokinin signaling and auxin regulated genes, which results in faster shoot  
250 development from the cotyledon explants.

251 Although there was a reduction in transformation efficiency with the addition of IAA from approximately 90%  
252 to about 50%, this level is acceptable considering transgenic lines can be evaluated significantly earlier than when  
253 our standard method was used. This decrease in time allows researchers to test their material earlier and make  
254 changes to their approaches sooner if results are unsatisfactory for their genes of interest.

255 In addition to supplementation of the standard plant regeneration medium with IAA, we also investigated  
256 effects of adding IAA to the rooting medium, which was not a component in our standard rooting medium.  
257 Inclusion of IAA in *in vitro* rooting medium has been reported for tomato, however, it is not routinely added  
258 because tomato readily develops roots in culture medium without growth regulators (Frery and Earle 1996). Our  
259 interest was to determine if supplementation decreased the time to rooting, which we did observe. Auxin is  
260 produced in both shoots and roots and the auxin produced in the roots helps in root development (Overvoorde et  
261 al. 2010; Petersson et al. 2009; Stepanova et al. 2008). It is possible that IAA, when exogenously added, increases  
262 the levels of auxin in the plants, hence resulting in the cells differentiating earlier to form roots. However,  
263 research needs to be conducted to confirm this hypothesis.

264

265 **Conclusions**

266 Interest in tomato as a model has increased over the years and we have seen a rise in the number of research  
267 groups that require stable transgenic lines for various studies. Modification of our standard plant regeneration  
268 medium through the addition of either 0.05 or 0.1 mg/l AA shortened the recovery of transgenic lines by 6 weeks  
269 for the M82 tomato cultivar. Application of this modification for transformation of other tomato genotypes in our  
270 lab also resulted in a decreased time for recovery of stable transgenic lines.

271 A shorter recovery time for stable transgenic lines is highly desirable for functional studies to allow earlier  
272 determination of the genes and networks involved in phenotypes of interest. A decrease in recovery time would  
273 also provide a higher throughput process, which has the potential for cost savings related to labor and resources.  
274 Optimization studies of standard transformation methodologies for different plant species should always be  
275 considered in order to alleviate bottlenecks for generation of stable transgenic lines (Altpeter et al. 2016).  
276 Availability of efficient transformation methods is especially critical with the rapid development of genome editing  
277 technologies, which will result in an increased demand for generation of transgenic lines for basic research studies  
278 that can lead to crop improvement.

279

280

281

282

283

284 **References**

- 285 Altpeter F, Springer NM, Bartley LE, Blechl AE, Brutnell TP, Citovsky V, Conrad LJ, Gelvin SB, Jackson DP, Kausch AP,  
286 Lemaux PG, Medford JI, Orozco-Cárdenas ML, Tricoli DM, Van Eck J, Voytas DF, Walbot V, Wang K, Zhang  
287 ZJ, Stewart CN, Jr. (2016) Advancing crop transformation in the era of genome editing. *Plant Cell* 28:1510-  
288 1520
- 289 Bombarely A, Menda N, Teclé IY, Buels RM, Strickler S, Fischer-York T, Pujar A, Leto J, Gosselin J, Mueller LA (2011)  
290 The Sol Genomics Network (solgenomics.net): growing tomatoes using Perl. *Nucleic Acids Res* 39:1149-  
291 1155
- 292 Brooks C, Nekrasov V, Lippman ZB, Van Eck J (2014) Efficient gene editing in tomato in the first generation using  
293 the Clustered Regularly Interspaced Short Palindromic Repeats/CRISPR-Associated9 system. *Plant Physiol*  
294 166:1292-1297
- 295 Chen P-Y, Wang C-K, Soong S-C, To K-Y (2003) Complete sequence of the binary vector pBI121 and its application in  
296 cloning T-DNA insertion from transgenic plants. *Mol Breeding* 11:287-293.
- 297 Chyi Y-S, Phillips GC (1987) High efficiency *Agrobacterium*-mediated transformation of *Lycopersicon* based on  
298 conditions favorable for regeneration. *Plant Cell Rep* 6:105-108
- 299 Consortium TTG (2012) The tomato genome sequence provides insights into fleshy fruit evolution. *Nature* 485:635-  
300 641
- 301 Dan Y, Zhang S, Matherly A (2016) Regulation of hydrogen peroxide accumulation and death of *Agrobacterium*-  
302 transformed cells in tomato transformation. *Plant Cell Tiss Organ Cult* doi:10.1007/s11240-016-1045-y
- 303 Emmanuel E, Levy AA (2002) Tomato mutants as tools for functional genomics. *Curr Opin Plant Biol* 5:112-117
- 304 Fillatti JJ, Kiser J, Rose R, Comai L (1987) Efficient transfer of a glyphosate tolerance gene into tomato using a  
305 binary *Agrobacterium tumefaciens* vector. *Bio-Technol* 5:726-730
- 306 Frary A, Earle ED (1996) An examination of factors affecting the efficiency of *Agrobacterium*-mediated  
307 transformation of tomato. *Plant Cell Rep* 16:235-240
- 308 Friml J, Vieten A, Sauer M, Weijers D, Schwarz H, Hamann T, Offringa R, Jurgens G (2003) Efflux-dependent auxin  
309 gradients establish the apical-basal axis of *Arabidopsis*. *Nature* 426:147-153
- 310 Gelvin SB (2003) *Agrobacterium*-mediated plant transformation: the biology behind the "gene-jockeying" tool.  
311 *Microbiol Mol Biol Rev* 67:16-37
- 312 Gonzali S, Mazzucato A, Perata P (2009) Purple as a tomato: towards high anthocyanin tomatoes. *Trends Plant Sci*  
313 14:237-241
- 314 Gubis J, Lajchova Z, Farago J, Jurekova Z (2004) Effect of growth regulators on shoot induction and plant  
315 regeneration in tomato (*Lycopersicon esculentum* Mill.). *Biologia* 59:405-408
- 316 Gupta S, Rashotte AM (2012) Down-stream components of cytokinin signaling and the role of cytokinin throughout  
317 the plant. *Plant Cell Rep* 31:801-812
- 318 Ito Y, Nishizawa-Yokoi A, Endo M, Mikami M, Toki S (2015) CRISPR/Cas9-mediated mutagenesis of the RIN locus  
319 that regulates tomato fruit ripening. *Biochem Biophys Res Commun* 467:76-82
- 320 Jones JBJ (1998) *Tomato Plant Culture: In the Field, Greenhouse, and Home Garden*. CRC Press LLC, Boca Raton, FL
- 321 Martel C, Vrebalov J, Tafelmeyer P, Giovannoni JJ (2011) The tomato MADS-box transcription factor RIPENING  
322 INHIBITOR interacts with promoters involved in numerous ripening processes in a COLORLESS  
323 NONRIPENING-dependent manner. *Plant Physiol* 157:1568-1579
- 324 McCormick S, Niedermeyer J, Fry J, Barnason A, Horsch R, Fraley R (1986) Leaf disk transformation of cultivated  
325 tomato (*L. esculentum*) using *Agrobacterium tumefaciens*. *Plant Cell Rep* 5:81-84
- 326 Murashige T, Skoog F (1962) A revised medium for rapid growth and bio assays with tobacco tissue cultures.  
327 *Physiol Plantarum* 15:473-497
- 328 Nguyen HP, Chakravarthy S, Velasquez AC, McLane HL, Zeng L, Nakayashiki H, Park DH, Collmer A, Martin GB  
329 (2010) Methods to study PAMP-triggered immunity using tomato and *Nicotiana benthamiana*. *Mol Plant*  
330 *Microbe Interact* 23:991-999
- 331 Overvoorde P, Fukaki H, Beeckman T (2010) Auxin control of root development. *Cold Spring Harb Perspect Biol*  
332 21:1-16.
- 333 Park SH, Morris JL, Park JE, Hirschi KD, Smith RH (2003) Efficient and genotype-independent *Agrobacterium* -  
334 mediated tomato transformation. *J Plant Physiol* 160:1253-1257

- 335 Petersson SV, Johansson AI, Kowalczyk M, Makoveychuk A, Wang JY, Moritz T, Grebe M, Benfey PN, Sandberg G,  
336 Ljung K (2009) An auxin gradient and maximum in the *Arabidopsis* root apex shown by high-resolution  
337 cell-specific analysis of IAA distribution and synthesis. *Plant Cell* 21:1659-1668
- 338 Pitzschke A, Hirt H (2010) New insights into an old story: *Agrobacterium*-induced tumour formation in plants by  
339 plant transformation. *EMBO J* 29:1021-1032
- 340 Sabatini S, Beis D, Wolkenfelt H, Murfett J, Guilfoyle T, Malamy J, Benfey P, Leyser O, Bechtold N, Weisbeek P,  
341 Scheres B (1999) An auxin-dependent distal organizer of pattern and polarity in the *Arabidopsis* root. *Cell*  
342 99:463-472
- 343 Shimizu-Sato S, Tanaka M, Mori H (2009) Auxin-cytokinin interactions in the control of shoot branching. *Plant Mol*  
344 *Biol* 69:429-435
- 345 Somerville C, Koornneef M (2002) A fortunate choice: the history of *Arabidopsis* as a model plant. *Nat Rev Genet*  
346 3:883-889
- 347 Stepanova AN, Robertson-Hoyt J, Yun J, Benavente LM, Xie DY, Dolezal K, Schlereth A, Jurgens G, Alonso JM (2008)  
348 TAA1-mediated auxin biosynthesis is essential for hormone crosstalk and plant development. *Cell*  
349 133:177-191
- 350 Sun HJ, Uchii S, Watanabe S, Ezura H (2006) A highly efficient transformation protocol for Micro-Tom, a model  
351 cultivar for tomato functional genomics. *Plant Cell Physiol* 47:426-431
- 352 Sun W, Xu X, Zhu H, Liu A, Liu L, Li J, Hua X (2010) Comparative transcriptomic profiling of a salt-tolerant wild  
353 tomato species and a salt-sensitive tomato cultivar. *Plant Cell Physiol* 51:997-1006
- 354 Van Eck J, Kirk DD, Walmsley AM (2006) Tomato (*Lycopersicon esculentum*). In: Wang K (ed) *Methods in Molecular*  
355 *Biology, Agrobacterium Protocols*. vol 343. Humana Press Inc., Totowa, NJ, pp 459-473
- 356 Xu C, Liberatore KL, MacAlister CA, Huang Z, Chu YH, Jiang K, Brooks C, Ogawa-Ohnishi M, Xiong G, Pauly M, Van  
357 Eck J, Matsubayashi Y, van der Knaap E, Lippman ZB (2015) A cascade of arabinosyltransferases controls  
358 shoot meristem size in tomato. *Nat Genet* 47:784-792
- 359 Yasmeen A (2009) An improved protocol for the regeneration and transformation of tomato (cv Rio Grande). *Acta*  
360 *Physiol Plant* 31:1271-1277
- 361

362

## 363 **Figure Legends**

### 364 **Figure 1**

365 **Results for the recovery of *Solanum lycopersicum* cv M82 stable transgenics from *Agrobacterium tumefaciens*-**  
366 **infected cotyledon explants cultured on plant regeneration medium supplemented with different**

367 **concentrations of indole-3-acetic acid (IAA). (A) *Agrobacterium tumefaciens*-infected cotyledon explants**

368 (approximately 5 weeks post infection) cultured on selective plant regeneration medium containing the following

369 amounts of IAA in mg/l (f) 0.01, (g) 0.05, (h) 0.1, (i) 0.5, and (j) 0. Images a – e represent the corresponding non-

370 infected controls for each IAA concentration, respectively.

371 (B) Histochemical analysis for GUS expression in leaves taken from independent transgenic lines designated 1 - 9

372 recovered from selective plant regeneration medium that contained 0.1 mg/l IAA. GUS expression was not

373 observed in the non-transformed controls.

374 (C) Agarose gel of PCR products showing the expected ~700 bp product amplified from the *nptII* selectable marker  
375 gene in 10 independent transgenic lines (lanes 1 – 10). These lines were recovered from selective plant  
376 regeneration medium that contained 0.1 mg/l IAA. C = the control

377 **Figure 2**

378 **Schematic representation of the optimized *Agrobacterium tumefaciens*-mediated transformation methodology**  
379 **for *Solanum lycopersicum* cv M82.** See the Materials and Methods for details on seed sterilization and all media  
380 compositions.

381

382 **Tables**

383 **Table 1: Results for recovery of stable transgenic lines of *Solanum lycopersicum* cv M82 from *Agrobacterium***  
384 ***tumefaciens*-infected cotyledon explants cultured on selective plant regeneration medium supplemented with**  
385 **different indole-3-acetic acid (IAA) concentrations.**

| IAA (mg/l) | Total number explants | Total number rooted plants | Average transformation efficiency ( $\pm$ ) SE* | Total time for recovery of transgenic lines (wks) |
|------------|-----------------------|----------------------------|-------------------------------------------------|---------------------------------------------------|
| 0          | 750                   | 660                        | 88 $\pm$ 2.2                                    | 17                                                |
| 0.01       | 750                   | 390                        | 52 $\pm$ 1.0                                    | 15                                                |
| 0.05       | 750                   | 375                        | 50 $\pm$ 1.5                                    | 11                                                |
| 0.1        | 750                   | 405                        | 54 $\pm$ 1.2                                    | 11                                                |
| 0.5        | 750                   | 360                        | 48 $\pm$ 2.0                                    | 16                                                |

386

387 \*Average transformation efficiency was calculated as percent of stable transgenic lines recovered from the total  
388 number of cotyledon explants infected with *Agrobacterium tumefaciens*. Transformation efficiency values shown  
389 are the average from 5 experiments  $\pm$  the standard error (SE) calculated from 3 biological replicates.

Gupta and Van Eck\_Figure 1

A

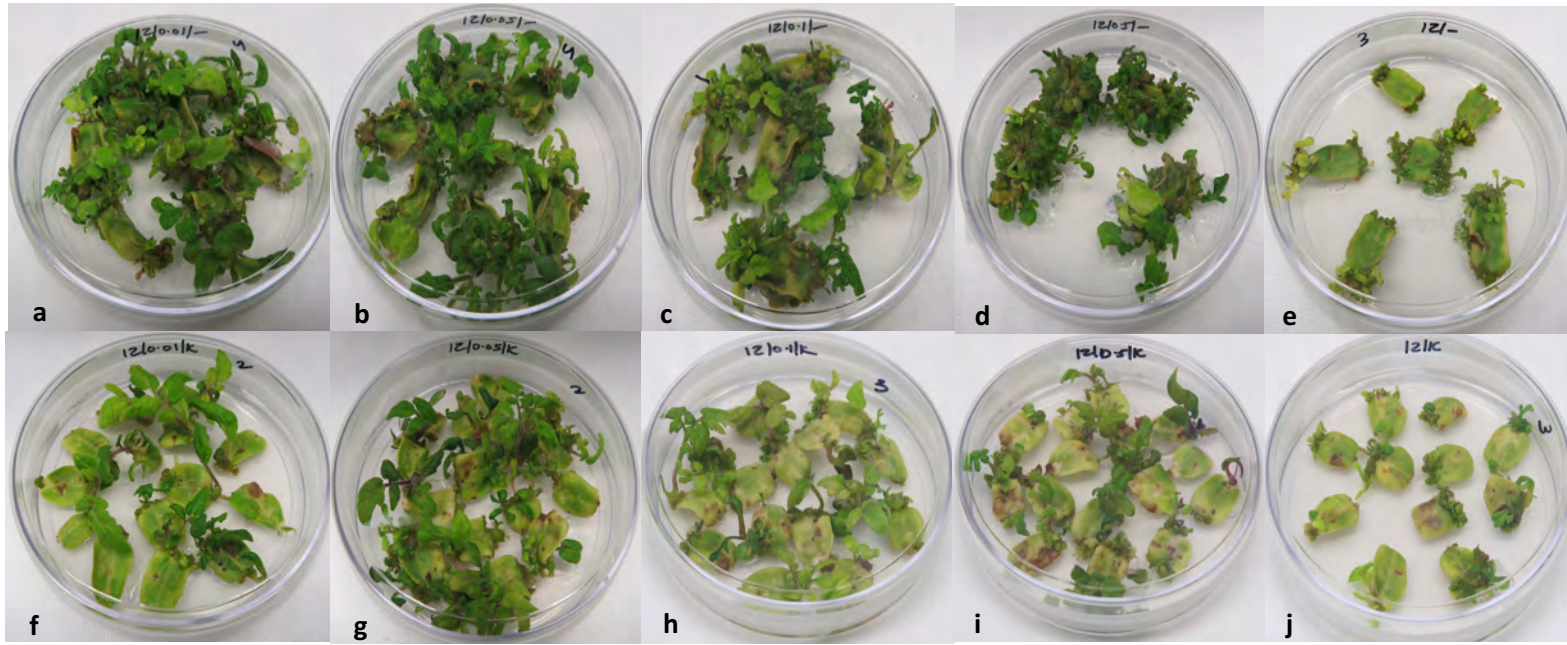

B

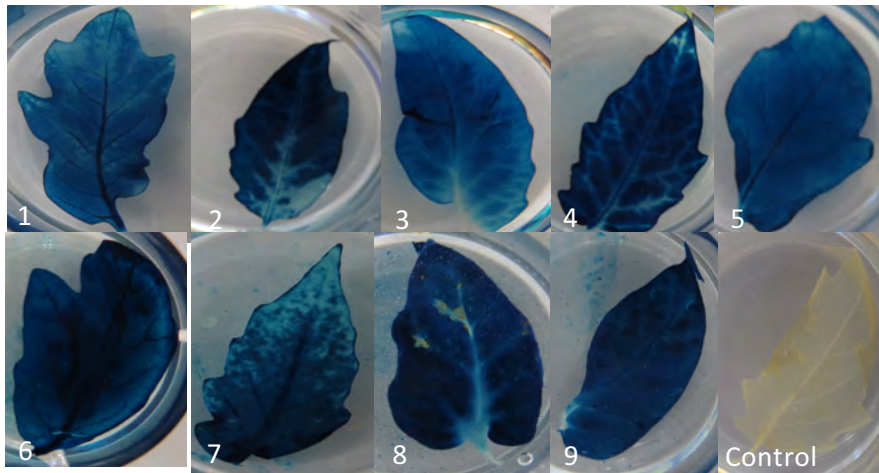

C

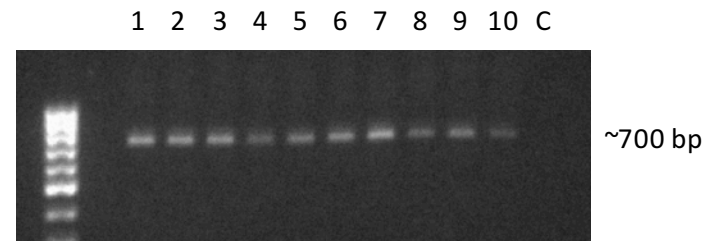

Gupta and Van Eck\_Figure 2

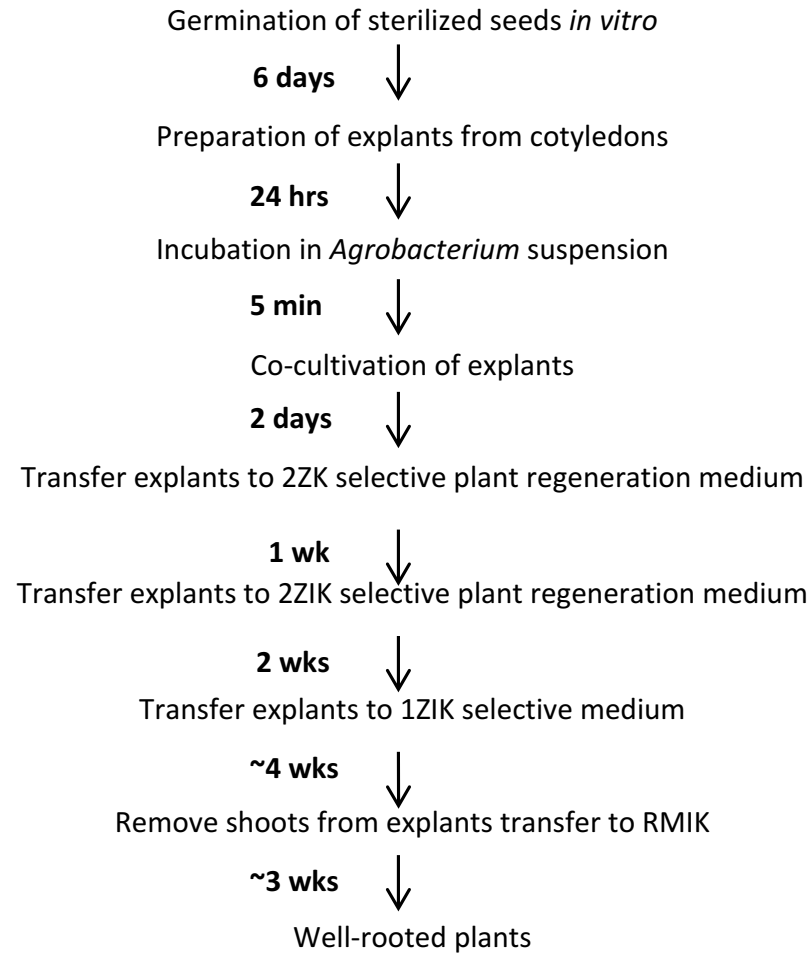

Source: http://biorxiv.org/content/10.1101/046839v2.full.pdf
